# Supplementary material
Source: ML conference proceedings conference paper supplement (https://openaccess.thecvf.com/content/WACV2024/html/Chang_Fast_Sun-Aligned_Outdoor_WACV_2024_paper.html)
Supplement: Supplementary file 2 [file Chang_Fast_Sun-Aligned_Outdoor_WACV_2024_supplemental.pdf]

# Fast Sun-aligned Outdoor Scene Relighting based on TensorRF

## —Supplementary Material—

|                                                                  | Site 1          | Site 2 | Site 3 |
|------------------------------------------------------------------|-----------------|--------|--------|
| Learning Rate (for Tensors)                                      | [0.01, 0.002]   |        |        |
| Learning Rate (for MLPs)                                         | [0.001, 0.0002] |        |        |
| Iteration                                                        | 54860           | 158777 | 136095 |
| $\lambda_1$ (for $\mathcal{L}_1$ )                               | [0.01, 0.001]   |        |        |
| $\lambda_2$ (for $\mathcal{L}_{TV}$ of $\mathcal{G}_\sigma$ )    | 0.1             |        |        |
| $\lambda_3$ (for $\mathcal{L}_{TV}$ of $\mathcal{G}_a$ )         | 0.01            |        |        |
| $\lambda_3$ (for $\mathcal{L}_{TV}$ of $\mathcal{G}_{cubemap}$ ) | 0.01            |        |        |
| $\lambda_2$ (for $\mathcal{L}_{shadow}$ regularization)          | 0.001           |        |        |

Table A. **Details of hyperparameters and loss weight terms.**  $[a, b]$  indicates the annealing from  $a$  to  $b$ .

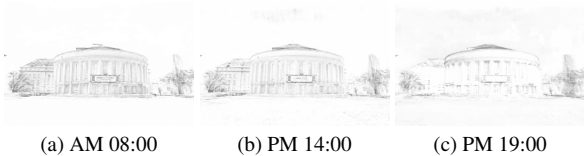

Figure A. **Relight by time.** Results when keeping other factors constant and only changing the sun direction for Site 2. The building is facing northwest.

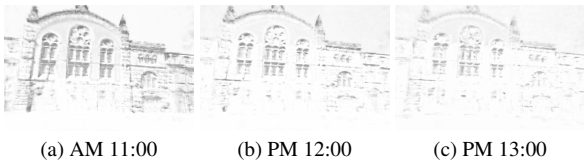

Figure B. **Relight by time.** Results when keeping other factors constant and only changing the sun direction for Site 3. The building is facing southeast.

## A. Implementation Details

Tab. A presents the details of hyperparameters and our weights of the loss terms, which are tailored to the NeRF-OSR dataset [1].

## B. Relighting Results

Fig. A shows the shadows rendered for relighting for Site 2, and Fig. B for Site 3. Fig. C shows the additional qualitative results of relighting.

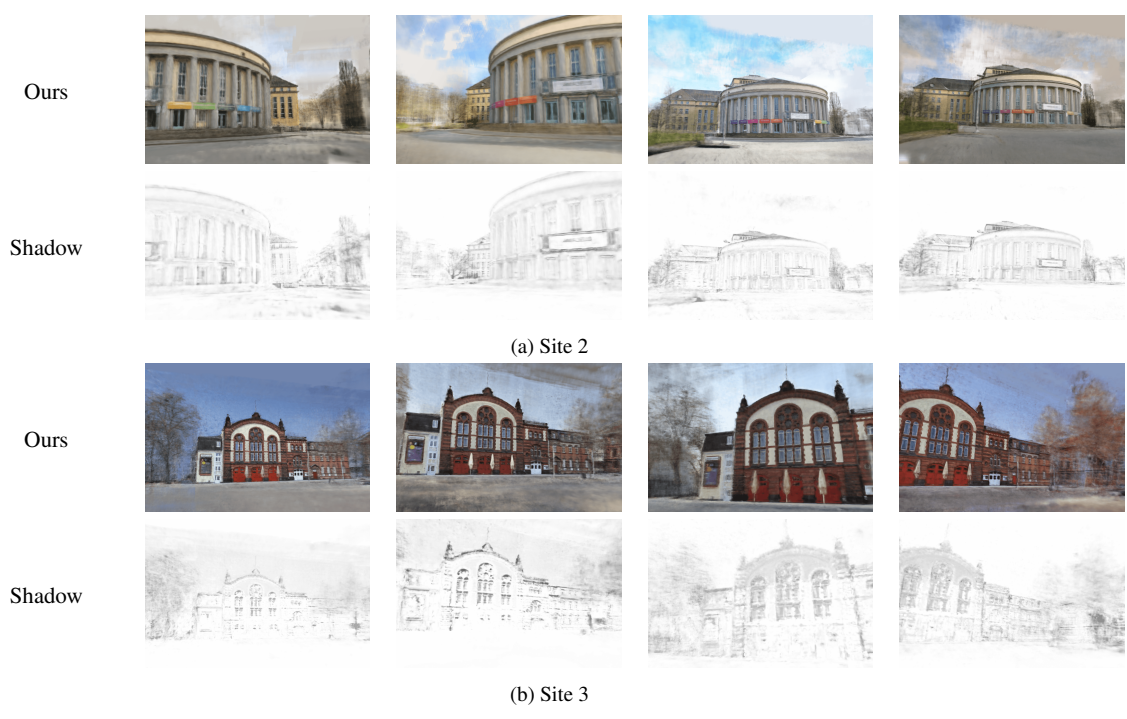

Figure C. Additional Relight Rendering.

## References

- [1] Viktor Rudnev, Mohamed Elgharib, William Smith, Lingjie Liu, Vladislav Golyanik, and Christian Theobalt. Nerf for outdoor scene relighting. In *European Conference on Computer Vision*, pages 615–631. Springer, 2022. [1](#)
